# Supplementary material for: New-onset IgG autoantibodies in hospitalized patients with COVID-19
Source: PubMed Central journal article supplement (PMC8440763; doi:10.1038/s41467-021-25509-3), 2021-09-14
Supplement: 41467_2021_25509_MOESM1_ESM.pdf [file 41467_2021_25509_MOESM1_ESM.pdf]

## SUPPLEMENTARY FIGURES

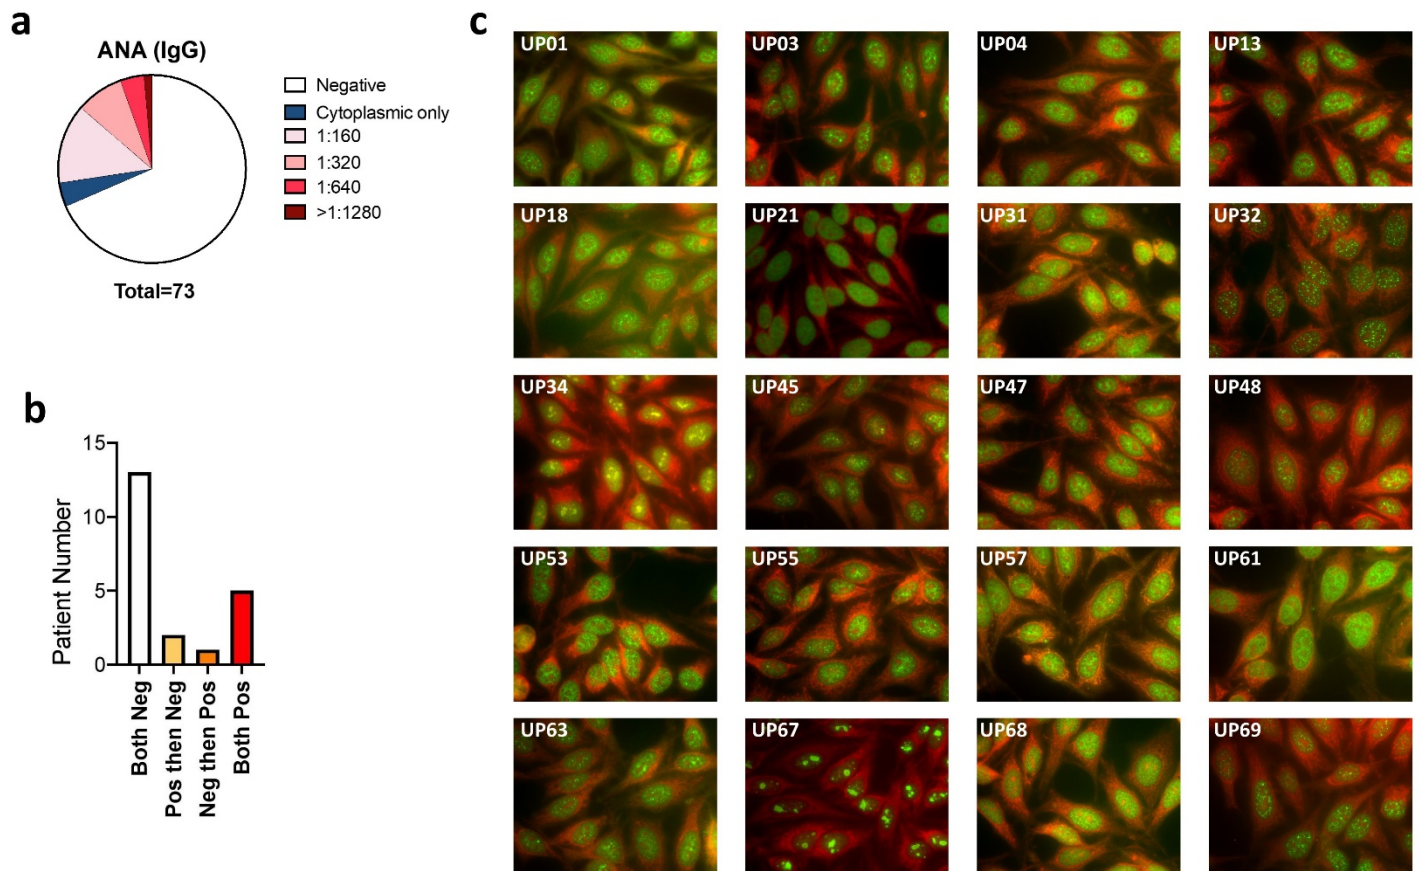

**Supplementary Fig. 1: Anti-Nuclear Antibody (ANA) staining in University of Pennsylvania COVID-19 patient cohort.** **a** IgG ANA indirect immunofluorescence results at a screening titer of 1:80, with ANA positives defined as having nuclear staining at a titer at or above 1:160. Samples with nuclear staining at 1:160 were further diluted to 1:320, 1:640 and 1:1280 to evaluate the titer. Pie chart shows patient numbers (n=73 total), color coded by ANA titers (nuclear patterns only). 3 individuals with a cytoplasmic pattern at  $\geq 1:160$  are also included as “cytoplasmic only.” Further details on the staining patterns are provided in **Supplementary Table 1**. **b** Analysis of ANA data in paired samples obtained on 21 patients showing the number of patients with a change of 2-fold or more in ANA titers over time. **c** Images of positive ANAs from individual subjects. All ANA positive samples (those having nuclear staining at a titer of 1:160 or above) were imaged by fluorescence microscopy. 5 different images were collected for each sample and one representative image was chosen for display in **c**. **Supplementary**

**Table 1** includes all samples that were tested in the ANA and shows which of these samples were used for imaging. Of note, UP01 was also weakly positive for dsDNA antibodies.

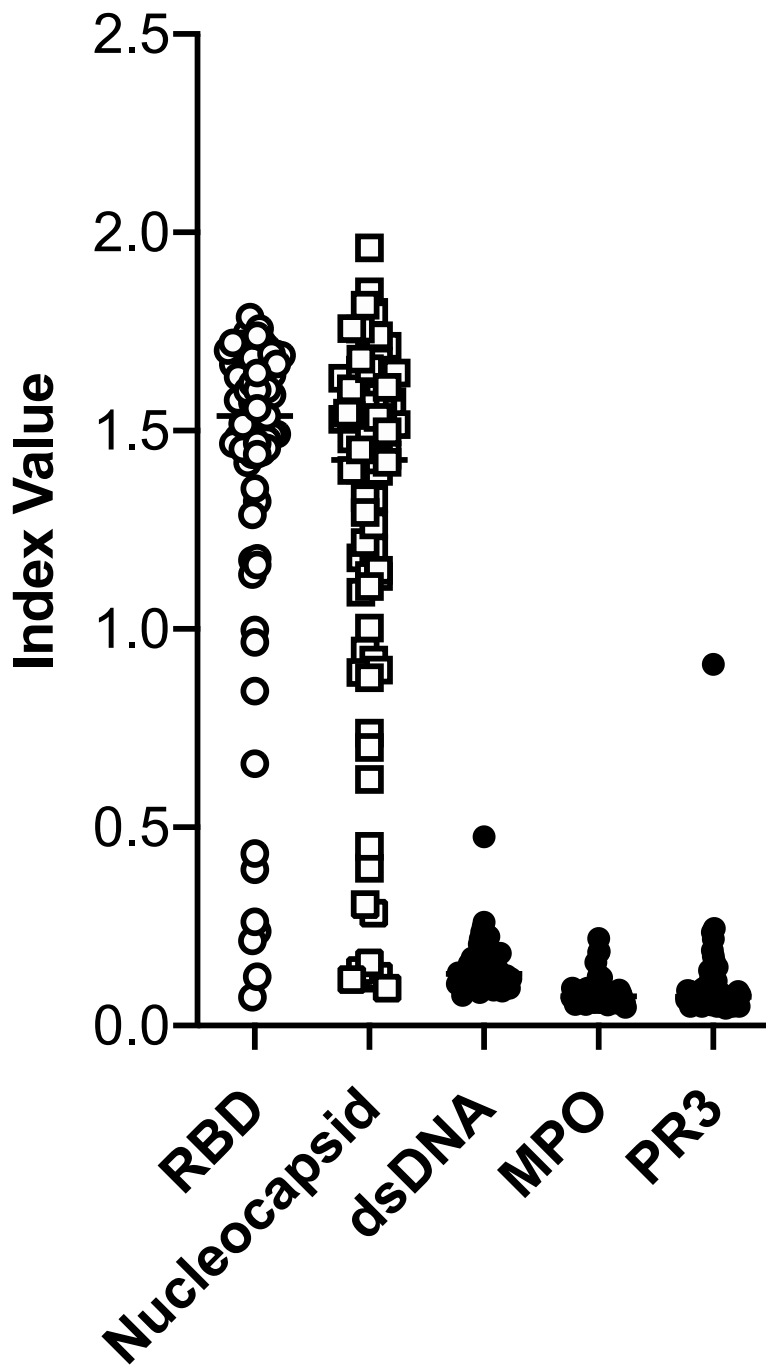

**Supplementary Fig. 2: IgG ELISAs of virus and autoantigen-binding.** Binding of IgG antibodies to SARS-CoV-2 receptor binding domain (RBD), nucleocapsid, and autoantigens (double stranded DNA (dsDNA), myeloperoxidase (MPO) and proteinase 3 (PR3)). Each symbol represents a patient (N=73). For subjects in which there were two or more time points, the D7 time point was chosen except for subject UP68, in whom the D14 time point was chosen. UP01 had a weakly positive dsDNA result. UP43 was positive for PR3. Source data are provided as a Source Data file.

Supplementary Figures related to Figure 1.

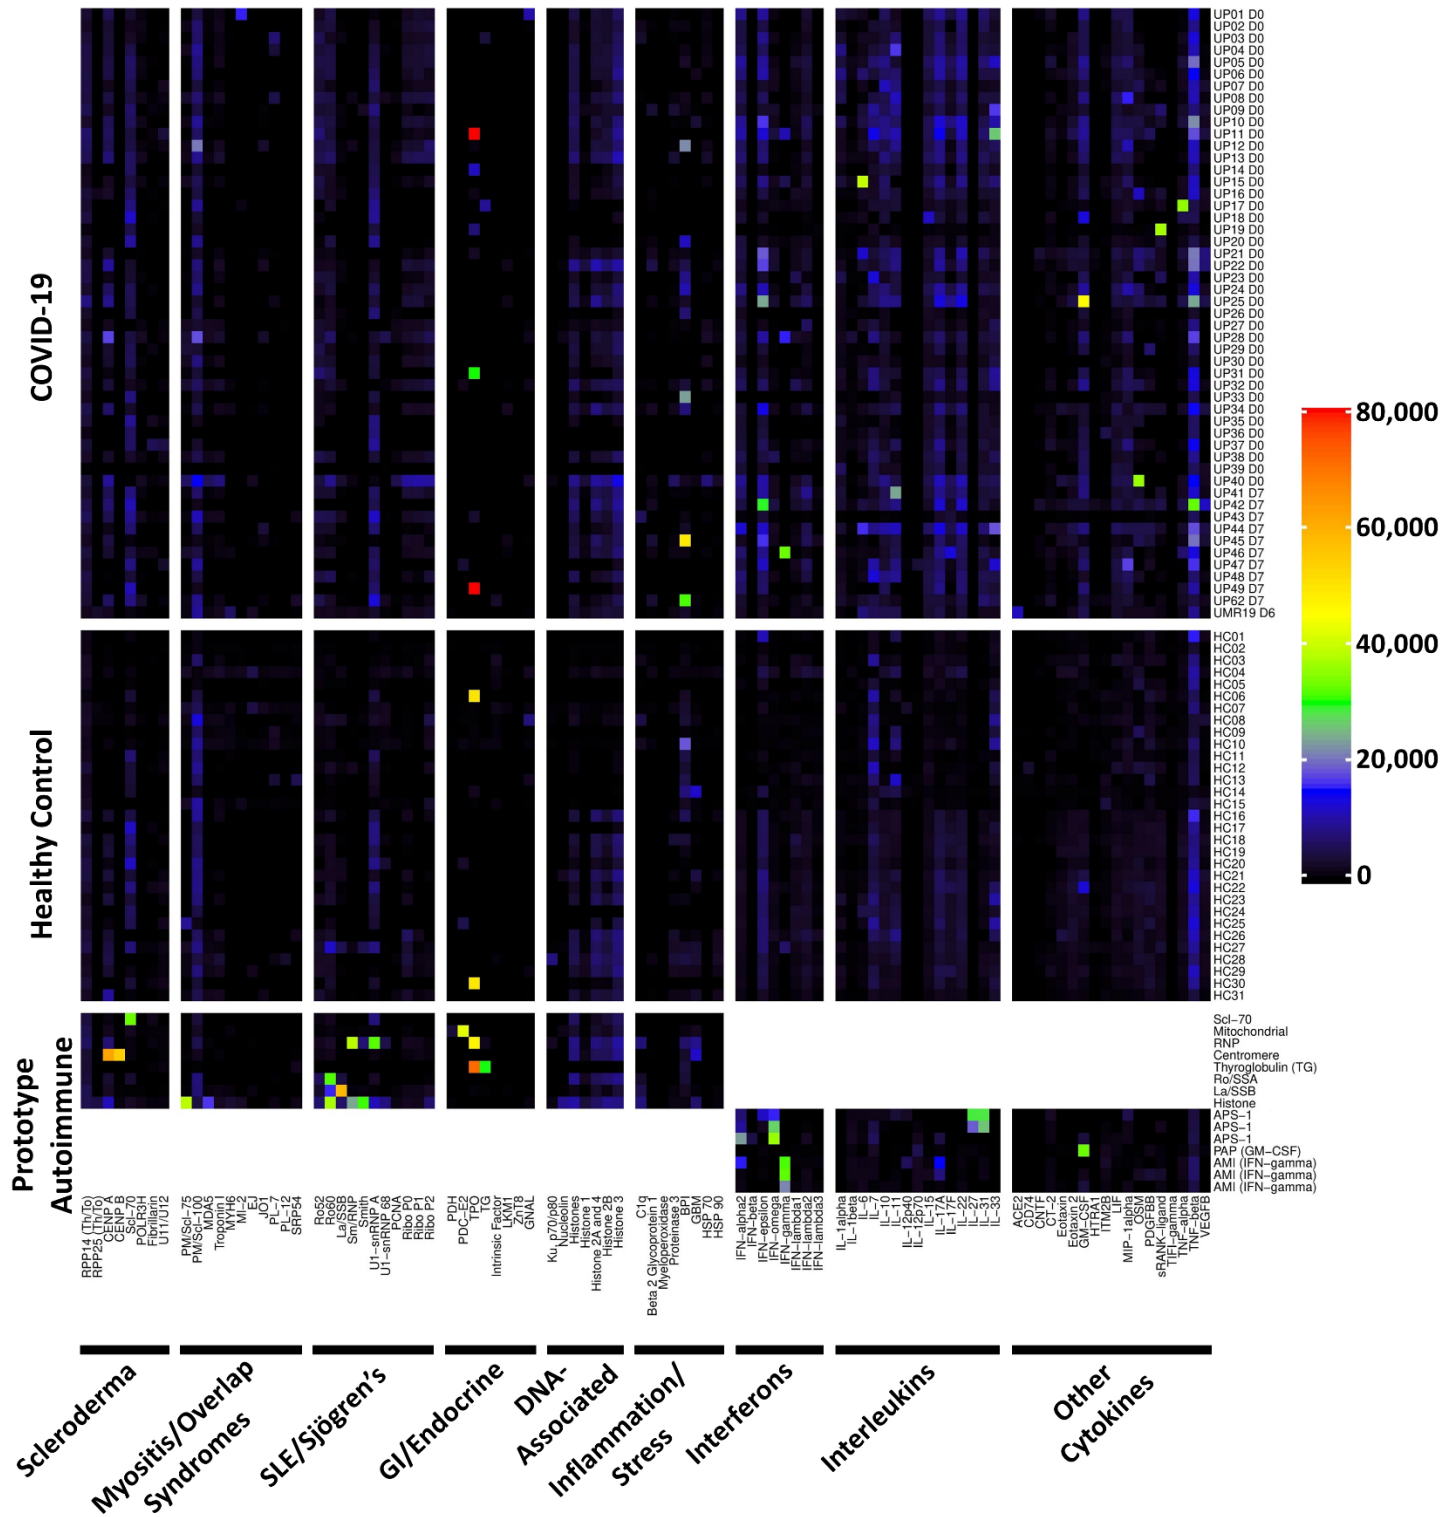

Supplementary Fig. 3: Heatmap of MFI corresponding to Figure 1. Source data are provided as a Source Data file.

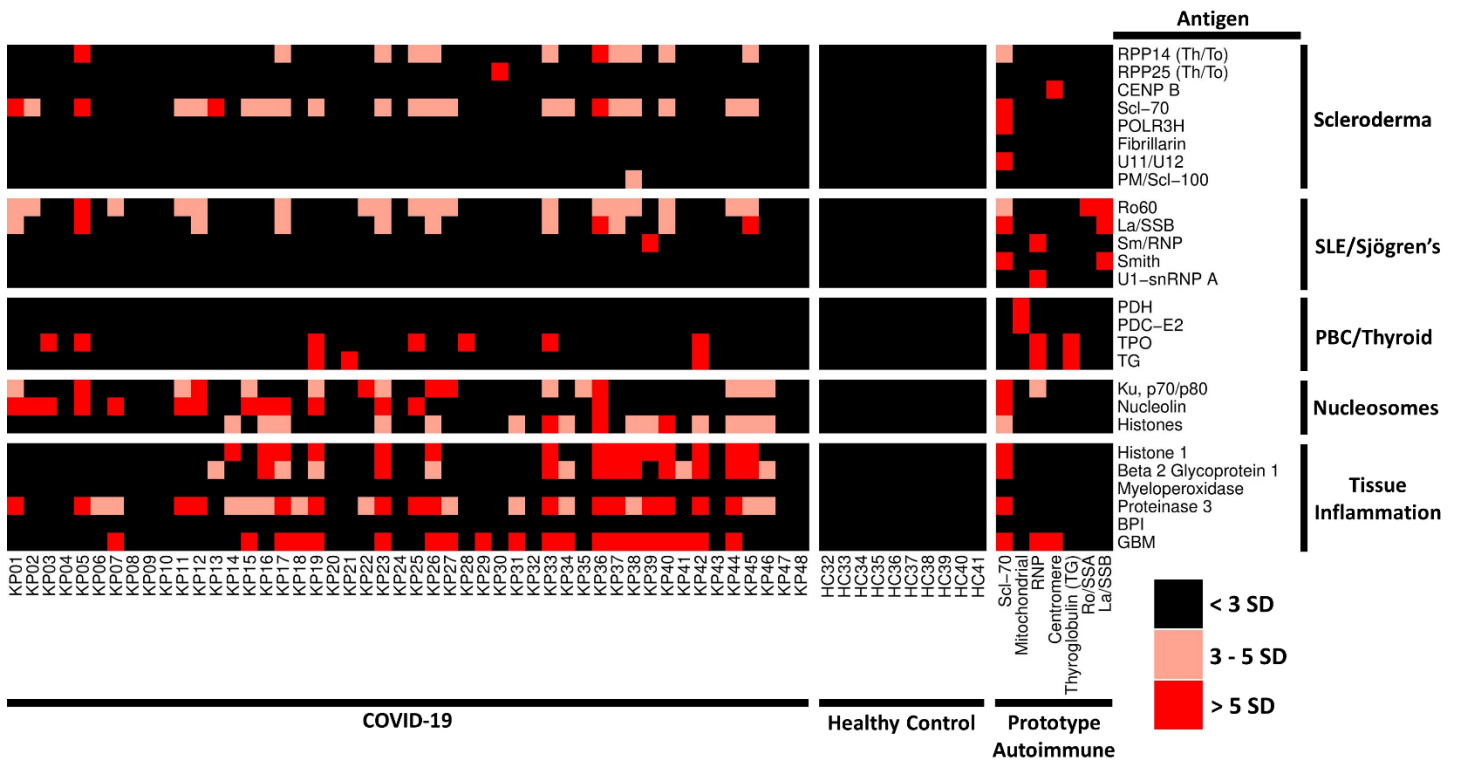

**Supplementary Fig. 4: Validation in Kaiser Permanente cohort.** Standard deviation heatmap depicting serum IgG antibodies discovered using a first generation 26-plex bead-based protein array containing the indicated autoantigens (y-axis). Autoantigens are grouped based on disease (scleroderma, SLE/Sjögren's, primary biliary cirrhosis (PBC)/thyroid, nucleosomes, and antigens associated with tissue inflammation). COVID-19 patients from Kaiser Permanente (left panel, n=48). HC (n=10, middle panel), and 7 prototype autoimmune disorders (right panel) are shown. Colors indicate autoantibodies whose MFI measurements are >5 SD (red), <5 or >3 SD (pink) or <3 SD (black) above the average MFI for HC. MFIs <5,000 were excluded. Source data are provided as a Source Data file.

Supplementary Figures related to Fig. 3:

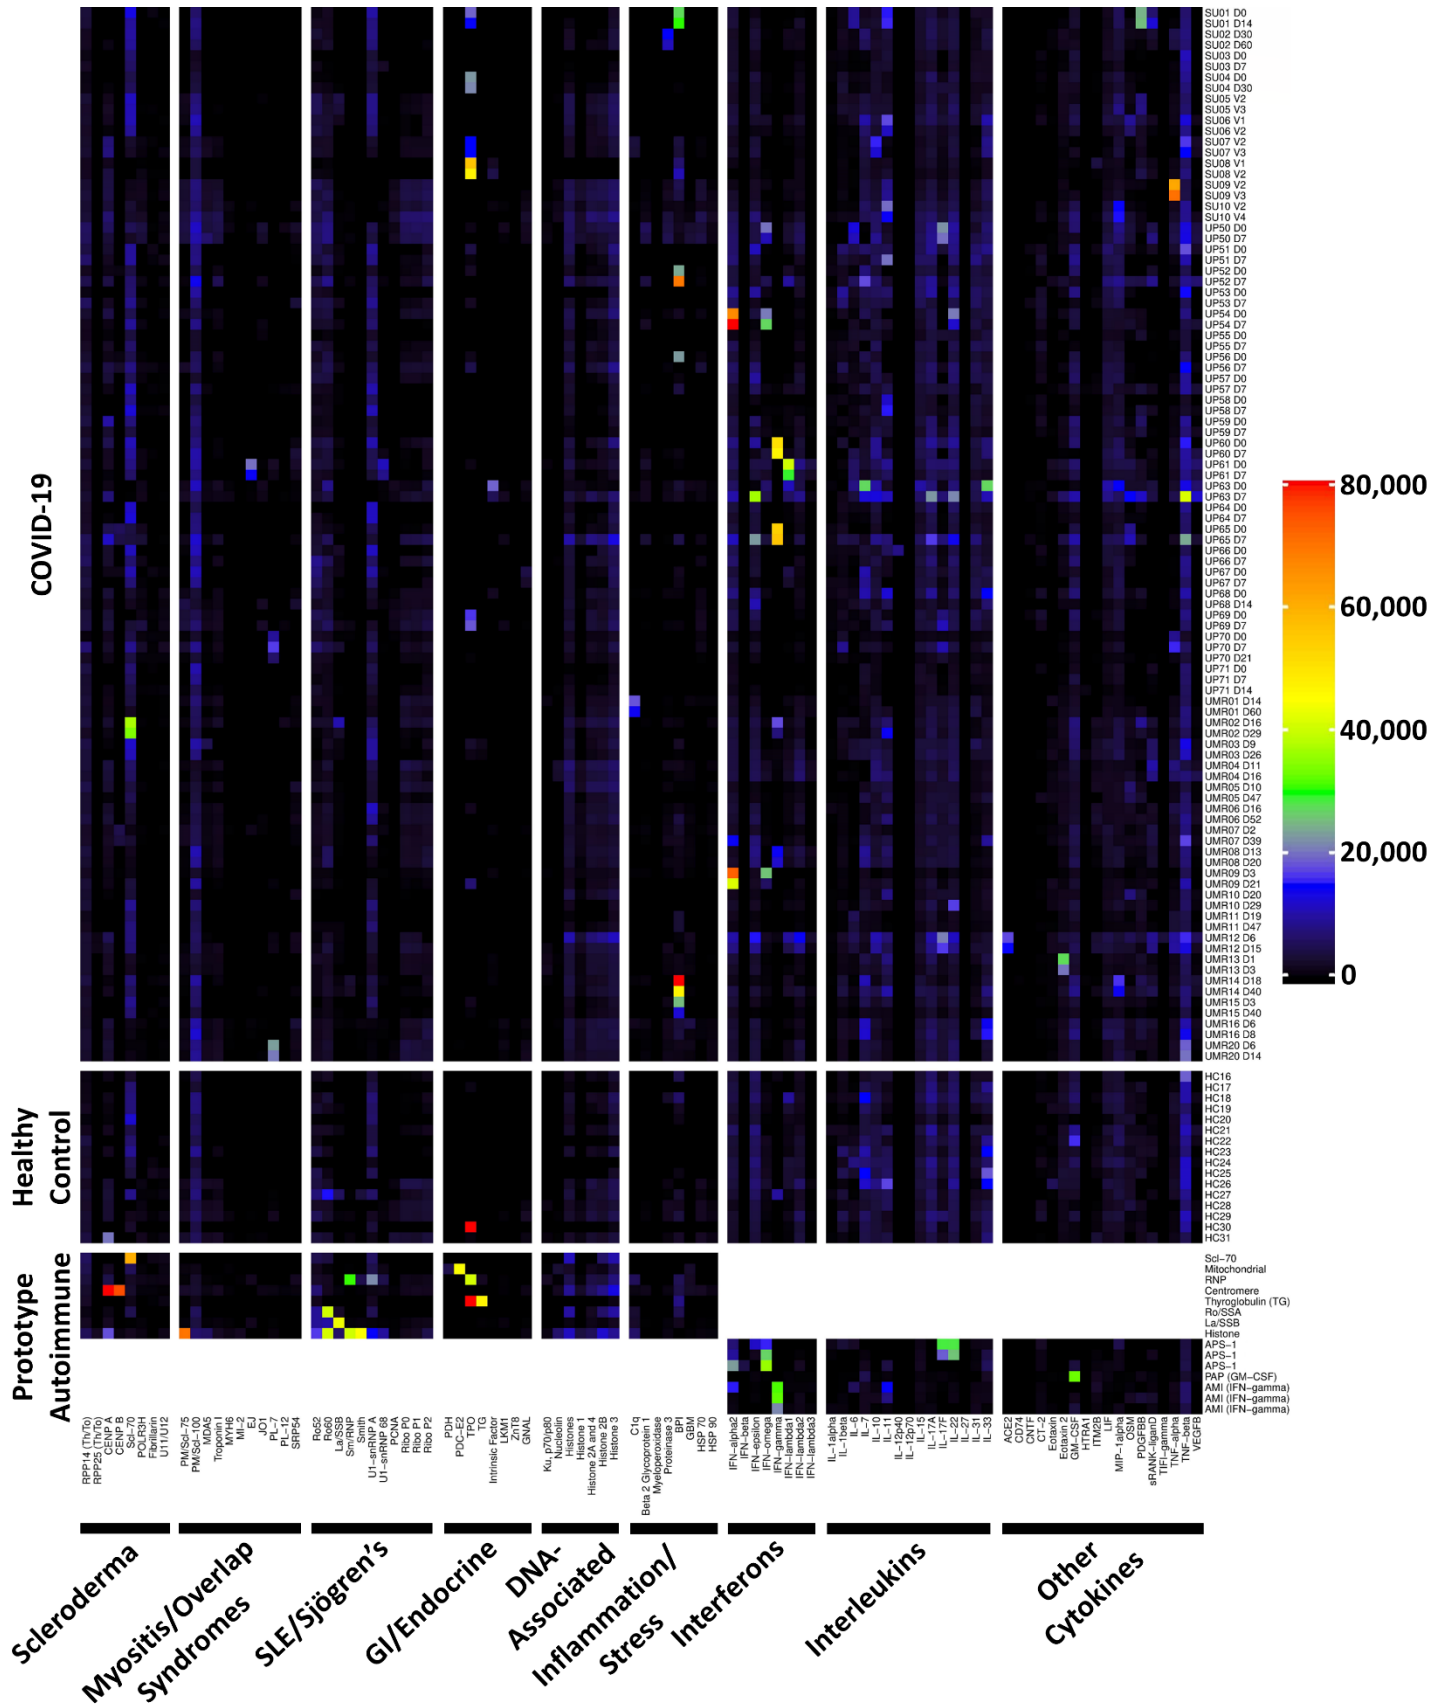

**Supplementary Fig. 5: Evolution of IgG autoantibody development over time in hospitalized COVID-19 patients.** **a** Heatmap using the same 53-plex bead-based protein array presented in Figure 1, containing the indicated autoantigens (x-axis). Autoantigens are grouped based on disease (scleroderma, myositis and overlap syndromes such as MCTD, SLE/Sjögren's, gastrointestinal and endocrine disorders), DNA-associated antigens, and antigens associated with tissue inflammation or stress responses. COVID-19 patients (top panel, n=98 longitudinal COVID-19 samples, including 92 paired samples from 46 subjects and two subjects who had three available timepoints each, subject UP70 and UP71). HC (n=16, middle panel), and 8 prototype autoimmune disorders (bottom panel) are shown. **b** Heatmap using a 41-plex array of cytokines, chemokines, growth factors, and receptors. The same samples in Panel A were also analyzed for ACA. Cytokines are grouped on the x-axis by category (interferons, interleukins, and other cytokines/growth factors/receptors). Prototype samples from patients with immunodeficiency disorders include three patients with APS-1, one patient with PAP, and three patients with AMI. Colors correspond to the MFI values shown at far right. Source data are provided as a Source Data file.





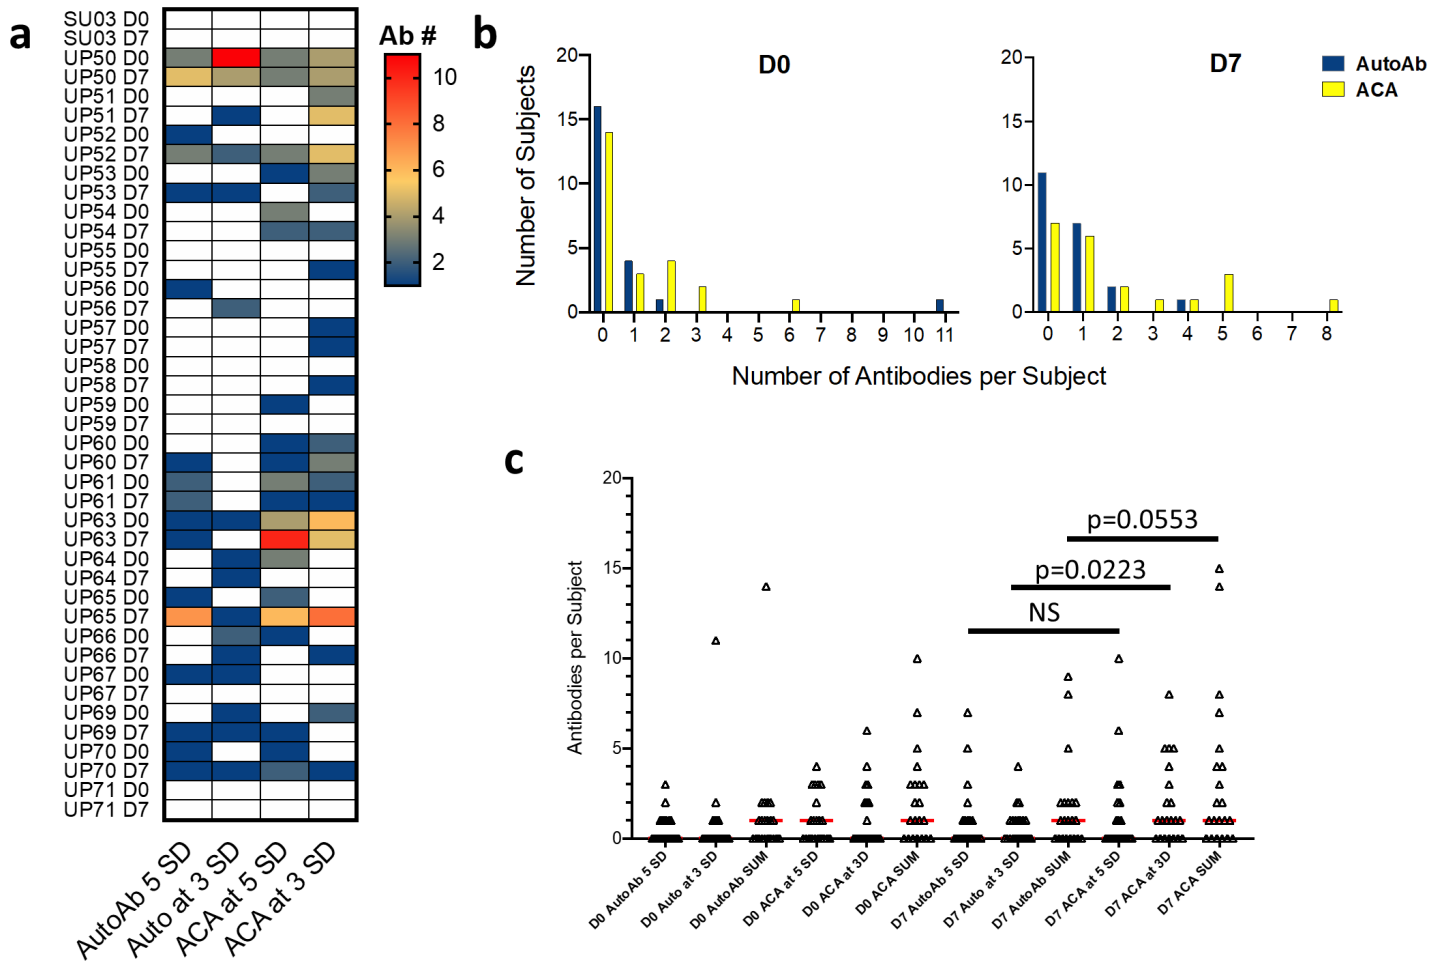

**Supplementary Fig. 7: Number of antibodies in 21 subjects with paired D0 and D7 time point data, stratified by reactivity category.** **a** Heatmap of individual subjects. Rows denote subjects and time points in days (day 0, D0 and day 7, D7). Columns denote Autoantibodies (AutoAb) and Anti-Cytokine Antibodies (ACA). Antibodies are above 5 standard deviations compared to pooled healthy controls (5 SD) or between 3 and 5 standard deviations (3 SD). White cells indicate 0 antibodies. **b** Antibody counts at D0 and D7 stratified by antibody category. Autoantibody (AutoAb, blue) and anti-cytokine antibody (ACA, yellow) counts are shown for the same 21 subjects at Day 0, (left) and Day 7 (right). Counts were based on antibodies that were present at levels between 3 and 5 SD above the average MFI for healthy control samples. **c** Antibodies per subject shown for different antibody level cut-offs. 5 SD = > 5 SD above the average MFI for the HC group; 3 SD = >3 and <5 SD above the average MFI for HC; In SUM, the 5 and 3 SD data were separately added for each individual. This

category represents all antibodies detected at 3 SD or higher. AutoAb = autoantibodies; ACA = anti-cytokine antibodies. Horizontal red lines indicate medians. Each symbol represents a subject. P-values are computed using the two-sided Wilcoxon paired rank sum test. Only D7 AutoAb vs. D7 ACA were significant ( $p < 0.05$ ) for the 3 SD and SUM antibody levels. Source data are provided as a Source Data file.

**Supplementary Figures related to Figs. 4 and 5:**

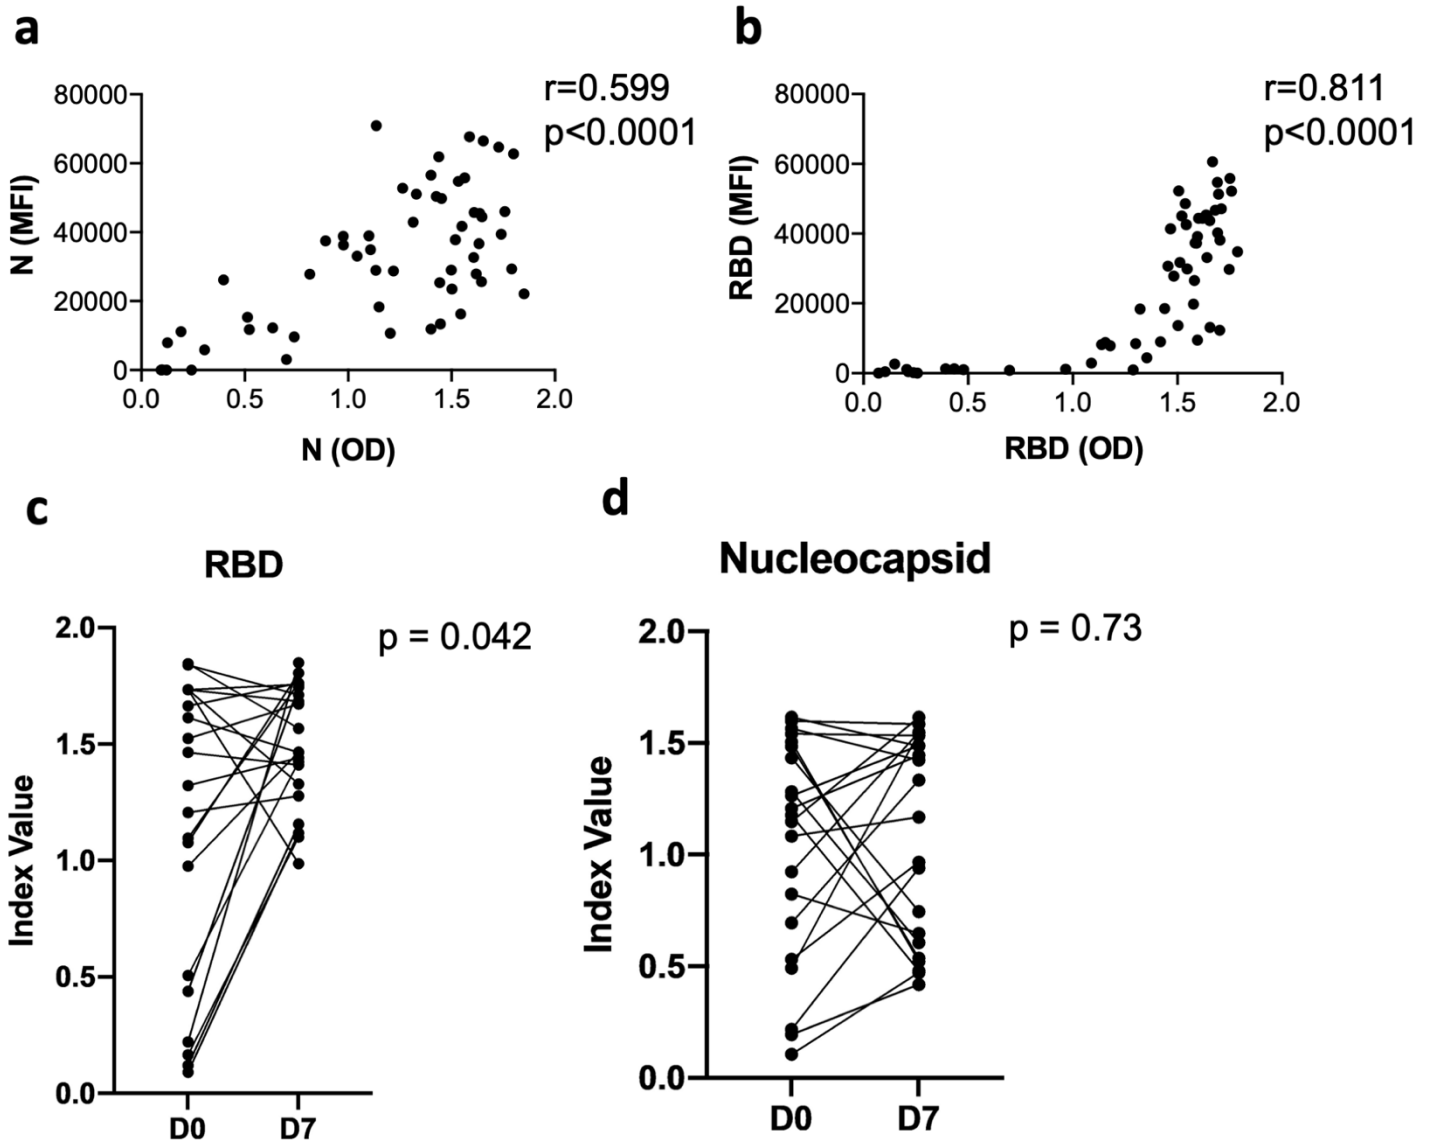

**Supplementary Fig. 8: Comparison between ELISA and bead-based assays. a and b** Correlation analysis between ELISA and multiplex bead data. All samples (including multiple time points from individual subjects) were included in the correlation analysis (N=57 samples from 35 individuals). Each symbol represents a sample with the mean fluorescence intensity (MFI) vs. the optical density (OD). Spearman correlations were computed with two-tailed p-values. **c and d** Two representative line plots for 21 patients with paired samples at D0 and D7. IgG antibodies increased over time for RBD ( $p=0.042$ ,

two-sided Wilcoxon rank sum test) but did not change over time for Nucleocapsid ( $p=0.73$ , NS, two-sided Wilcoxon rank sum test). Source data are provided as a Source Data file.

## Autoantigens

## Viral Antigens

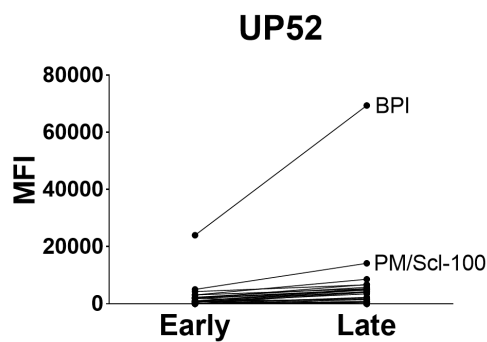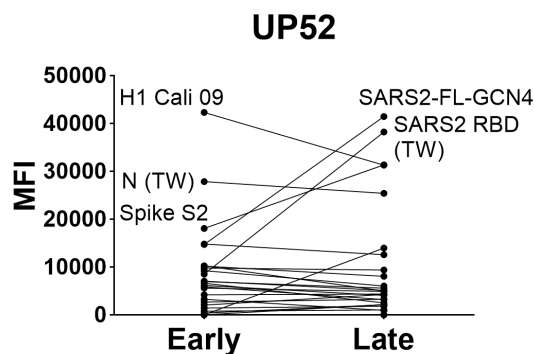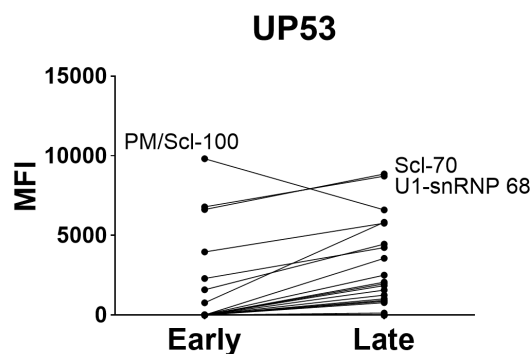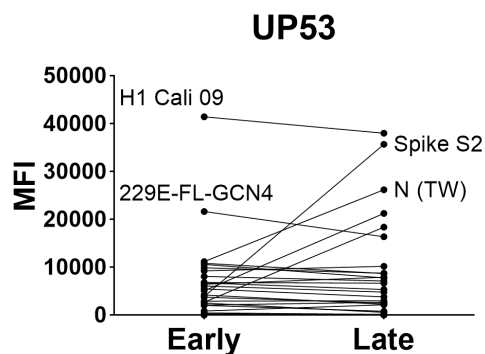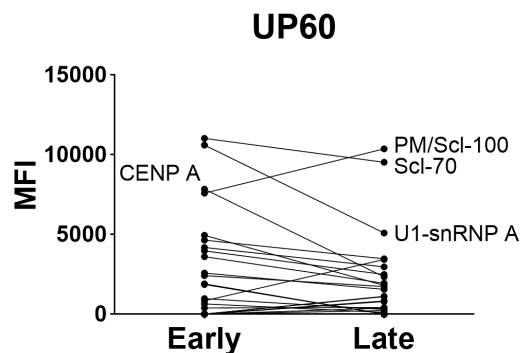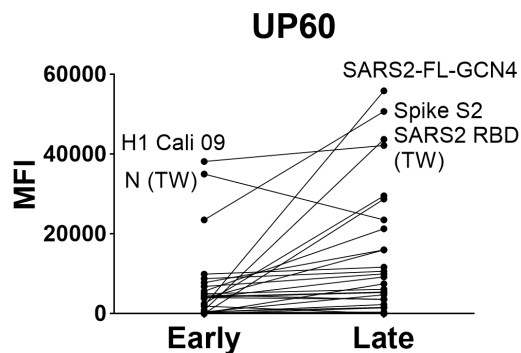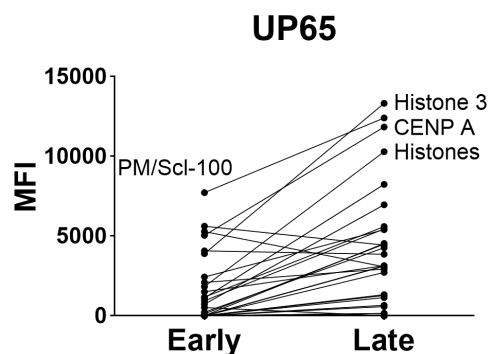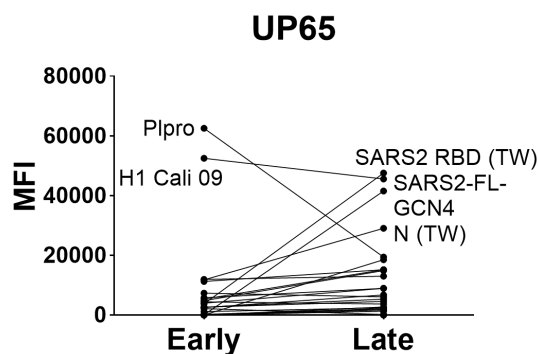

**Supplementary Fig. 9: Line graphs for individual autoantigens and viral antigens for the four patients with one or more newly triggered autoantibodies, corresponding to Figure 5. Source data are provided as a Source Data file.**

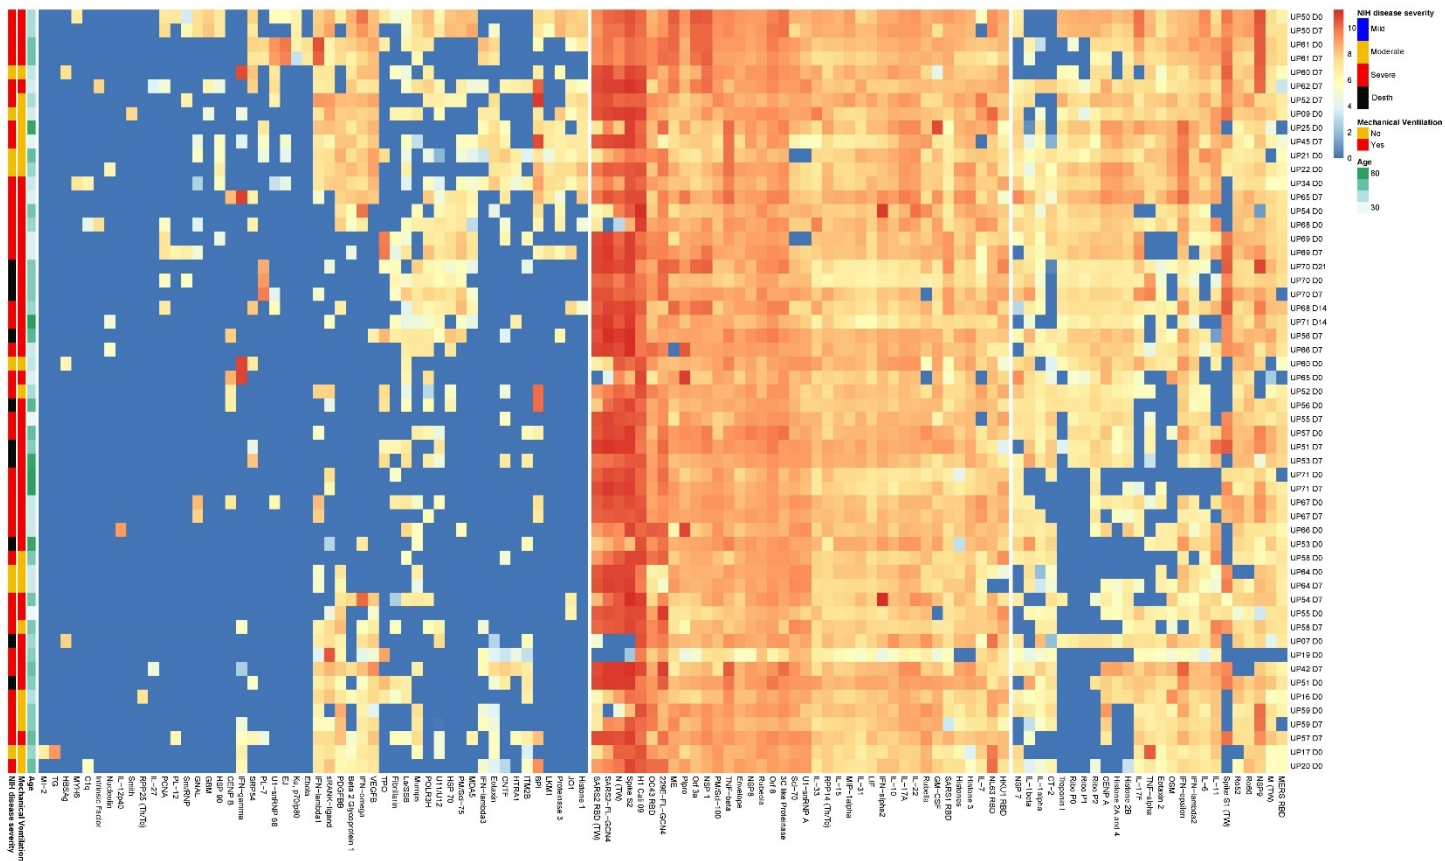

**Supplementary Fig. 10: Clinical annotation of the patient cohorts enrolled at the University of Pennsylvania Health System.** Heatmap demonstrating the abundance of autoantibodies and anti-cytokine antibodies (in log scale) for each subject at the timepoints indicated. To the left, clinical annotation of the patients with age, presence or absence of mechanical ventilation during hospitalization and maximum NIH disease severity score during hospitalization (levels: mild, moderate, severe, death). Source data are provided as a Source Data file.

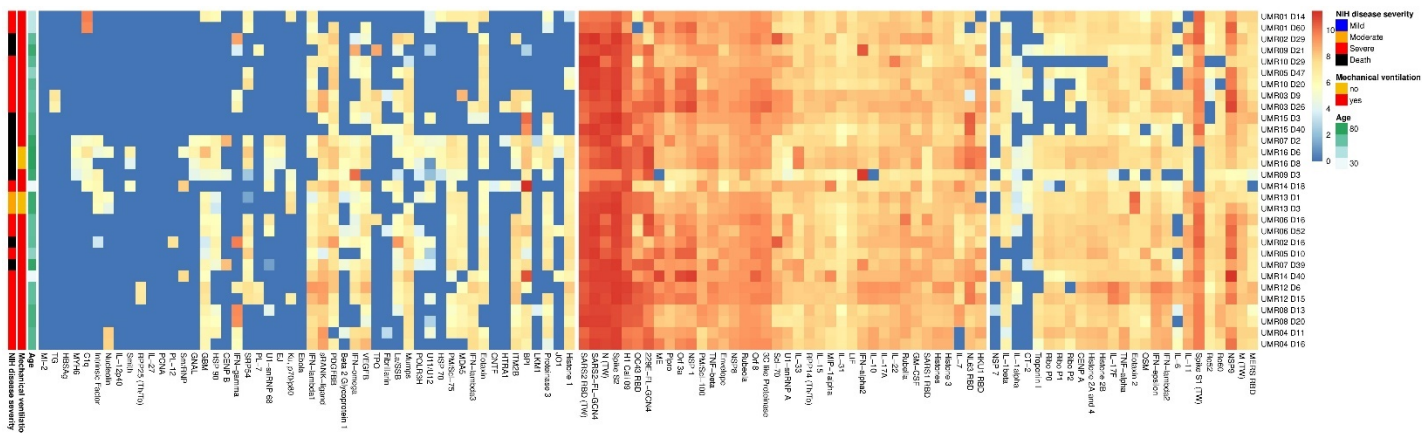

**Supplementary Fig. 11: Clinical annotation of the patient cohorts enrolled at the University of Marburg.** Heatmap demonstrating the abundance of autoantibodies and anti-cytokine antibodies (in log scale) for each subject at the timepoints indicated. To the left, clinical annotation of the patients with age, presence or absence of mechanical ventilation during hospitalization and maximum NIH disease severity score during hospitalization (levels: mild, moderate, severe, death). Source data are provided as a Source Data file.

## SUPPLEMENTARY TABLES

**Supplementary Table 1. ANA pattern and ANA titer for each UPenn sample.** A dilution of 1:160 was used. This is the dilution at which ANAs are considered to be positive in the clinical lab assay, which uses the same assay kit. ANA positive samples were further diluted at 1:320, 1:640, and 1:1280 to determine the titers. Images are also provided as indicated.

| ID      | Timepoint (D0, D7 etc.) | Nuclear pattern | ANA Titer | Other Pattern                  | ANA Interpretation | Image Provided |
|---------|-------------------------|-----------------|-----------|--------------------------------|--------------------|----------------|
| UP01 D0 | D0                      | Speckled        | 1:320     | None                           | pos                | Yes            |
| UP02 D0 | D0                      | None            | Neg       | None                           | neg                | -              |
| UP03 D0 | D0                      | Speckled        | 1:160     | None                           | pos                | Yes            |
| UP04 D0 | D0                      | Speckled        | 1:160     | None                           | pos                | Yes            |
| UP05 D0 | D0                      | None            | Neg       | None                           | neg                | -              |
| UP06 D0 | D0                      | None            | Neg       | None                           | neg                | -              |
| UP07 D0 | D0                      | None            | Neg       | None                           | neg                | -              |
| UP08 D0 | D0                      | Speckled        | 1:80      | None                           | neg                | -              |
| UP09 D0 | D0                      | None            | Neg       | None                           | neg                | -              |
| UP10 D0 | D0                      | None            | Neg       | None                           | neg                | -              |
| UP11 D0 | D0                      | None            | 1:80      | Very weak cytoplasmic speckled | neg                | -              |
| UP12 D0 | D0                      | None            | Neg       | None                           | neg                | -              |
| UP13 D0 | D0                      | Speckled        | 1:160     | None                           | pos                | Yes            |
| UP14 D0 | D0                      | None            | Neg       | None                           | neg                | -              |
| UP15 D0 | D0                      | None            | Neg       | None                           | neg                | -              |
| UP16 D0 | D0                      | None            | 1:160     | Cytoplasmic fluorescence       | Cytoplasmic only   | -              |
| UP17 D0 | D0                      | None            | Neg       | None                           | neg                | -              |
| UP18 D0 | D0                      | Diffuse         | 1:320     | None                           | pos                | Yes            |
| UP19 D0 | D0                      | None            | Neg       | None                           | neg                | -              |
| UP20 D0 | D0                      | Speckled        | 1:80      | None                           | neg                | -              |
| UP21 D0 | D0                      | Diffuse         | 1:640     | None                           | pos                | Yes            |
| UP22 D0 | D0                      | None            | Neg       | None                           | neg                | -              |
| UP23 D0 | D0                      | None            | Neg       | None                           | neg                | -              |
| UP24 D0 | D0                      | None            | Neg       | None                           | neg                | -              |
| UP25 D0 | D0                      | None            | Neg       | None                           | neg                | -              |
| UP26 D0 | D0                      | None            | Neg       | None                           | neg                | -              |
| UP27 D0 | D0                      | None            | Neg       | None                           | neg                | -              |
| UP28 D0 | D0                      | None            | Neg       | None                           | neg                | -              |
| UP29 D0 | D0                      | None            | Neg       | None                           | neg                | -              |
| UP30 D0 | D0                      | None            | Neg       | None                           | neg                | -              |



|         |    |               |       |                                              |                  |     |
|---------|----|---------------|-------|----------------------------------------------|------------------|-----|
| UP31 D0 | D0 | Speckled      | 1:160 | None                                         | pos              | Yes |
| UP32 D0 | D0 | Speckled      | 1:320 | None                                         | pos              | Yes |
| UP33 D0 | D0 | None          | Neg   | None                                         | neg              | -   |
| UP34 D0 | D0 | Nucleolar     | 1:320 | None                                         | pos              | Yes |
| UP35 D0 | D0 | Nucleolar     | 1:80  | None                                         | neg              | -   |
| UP36 D0 | D0 | None          | Neg   | None                                         | neg              | -   |
| UP37 D0 | D0 | None          | Neg   | None                                         | neg              | -   |
| UP38 D0 | D0 | None          | Neg   | None                                         | neg              | -   |
| UP39 D0 | D0 | None          | Neg   | None                                         | neg              | -   |
| UP40 D0 | D0 | None          | Neg   | None                                         | neg              | -   |
| UP41 D7 | D7 | None          | 1:160 | Weak cytoplasmic speckled and spindle fibers | Cytoplasmic only | -   |
| UP42 D7 | D7 | None          | Neg   | None                                         | neg              | -   |
| UP43 D7 | D7 | Weak speckled | 1:80  | Weak cytoplasmic                             | neg              | -   |
| UP44 D7 | D7 | None          | 1:160 | Weak cytoplasmic                             | Cytoplasmic only | -   |
| UP45 D7 | D7 | Speckled      | 1:640 | None                                         | pos              | Yes |
| UP46 D7 | D7 | Nucleolar     | 1:80  | None                                         | neg              | -   |
| UP47 D7 | D7 | Speckled      | 1:160 | None                                         | pos              | Yes |
| UP48 D7 | D7 | Speckled      | 1:160 | None                                         | pos              | Yes |
| UP49 D7 | D7 | Speckled      | 1:80  | None                                         | neg              | -   |
| UP50 D0 | D0 | None          | Neg   | None                                         | neg              | -   |
| UP50 D7 | D7 | None          | Neg   | None                                         | neg              | -   |
| UP51 D0 | D0 | None          | Neg   | None                                         | neg              | -   |
| UP51 D7 | D7 | None          | Neg   | None                                         | neg              | -   |
| UP52 D0 | D0 | Speckled      | 1:80  | None                                         | neg              | -   |
| UP52 D7 | D7 | None          | Neg   | None                                         | neg              | -   |
| UP53 D0 | D0 | Speckled      | 1:160 | None                                         | pos              | Yes |
| UP53 D7 | D7 | None          | Neg   | None                                         | neg              | -   |
| UP54 D0 | D0 | None          | Neg   | None                                         | neg              | -   |
| UP54 D7 | D7 | Weak nuclear  | 1:80  | None                                         | neg              | -   |
| UP55 D0 | D0 | None          | Neg   | None                                         | neg              | -   |
| UP55 D7 | D7 | Speckled      | 1:160 | None                                         | pos              | Yes |
| UP56 D0 | D0 | None          | Neg   | None                                         | neg              | -   |
| UP56 D7 | D7 | None          | Neg   | None                                         | neg              | -   |
| UP57 D0 | D0 | Speckled      | 1:320 | None                                         | pos              | Yes |
| UP57 D7 | D7 | Speckled      | 1:320 | None                                         | pos              | -   |
| UP58 D0 | D0 | None          | Neg   | None                                         | neg              | -   |
| UP58 D7 | D7 | None          | Neg   | None                                         | neg              | -   |
| UP59 D0 | D0 | None          | Neg   | None                                         | neg              | -   |
| UP59 D7 | D7 | None          | Neg   | None                                         | neg              | -   |
| UP60 D0 | D0 | None          | Neg   | None                                         | neg              | -   |
| UP60 D7 | D7 | None          | Neg   | None                                         | neg              | -   |

|             |     |           |          |      |     |     |
|-------------|-----|-----------|----------|------|-----|-----|
| UP61 D0     | D0  | Speckled  | 1:160    | None | pos | Yes |
| UP61 D7     | D7  | Speckled  | 1:160    | None | pos | -   |
| UP62 D7     | D7  | None      | Neg      | None | neg | -   |
| UP63 D0     | D0  | Speckled  | 1:160    | None | pos | Yes |
| UP63 D7     | D7  | None      | Neg      | None | neg | -   |
| UP64 D0     | D0  | None      | Neg      | None | neg | -   |
| UP64 D7     | D7  | None      | Neg      | None | neg | -   |
| UP65 D0     | D0  | None      | Neg      | None | neg | -   |
| UP65 D7     | D7  | None      | Neg      | None | neg | -   |
| UP66 D0     | D0  | None      | Neg      | None | neg | -   |
| UP66 D7     | D7  | None      | Neg      | None | neg | -   |
| UP67 D0     | D0  | Nucleolar | > 1:1280 | None | pos | Yes |
| UP67 D7     | D7  | Nucleolar | > 1:1280 | None | pos | -   |
| UP68 D0     | D0  | Speckled  | 1:160    | None | pos | Yes |
| UP68<br>D14 | D14 | Speckled  | 1:640    | None | pos | -   |
| UP69 D0     | D0  | Speckled  | 1:160    | None | pos | Yes |
| UP69 D7     | D7  | Speckled  | 1:320    | None | pos | -   |
| UP70 D0     | D0  | None      | Neg      | None | neg | -   |
| UP70<br>D21 | D21 | None      | Neg      | None | neg | -   |
| UP70 D7     | D7  | None      | Neg      | None | neg | -   |
| UP71 D0     | D0  | None      | Neg      | None | neg | -   |
| UP71<br>D14 | D14 | None      | Neg      | None | neg | -   |
| UP71 D7     | D7  | None      | Neg      | None | neg | -   |

**Supplementary Table 2. “COVID-19 Autoantigen Array” content.**

| <b>Autoantigen Array</b> |                                         |               |                  |
|--------------------------|-----------------------------------------|---------------|------------------|
| <b>Bead ID</b>           | <b>Antigen</b>                          | <b>Vendor</b> | <b>Catalog #</b> |
| 1                        | Bare Bead                               |               |                  |
| 2                        | Human IgG from serum                    | Sigma         | I4506            |
| 3                        | Anti-Human IgG Fc fragment Specific     | Jackson       | 109-005-008      |
| 4                        | Anti-Human IgG (H+L)                    | Jackson       | 109-005-003      |
| 5                        | Anti-Human IgG F(ab') fragment specific | Jackson       | 109-005-006      |
| 6                        | Beta 2 Glycoprotein 1                   | Diarect       | A14901           |
| 7                        | Myeloperoxidase                         | Diarect       | A18501           |
| 8                        | La/SSB                                  | Diarect       | A12801           |
| 9                        | Ro52                                    | Diarect       | A12701           |
| 10                       | Proteinase 3                            | Diarect       | A18601           |
| 11                       | Histone 1                               | Immunovision  | HIS-1001         |
| 12                       | Histone 2A and 4                        | Immunovision  | HIS-1002         |
| 13                       | Histone 2B                              | Immunovision  | HIS-1003         |
| 14                       | CENP B                                  | Diarect       | A12501           |
| 15                       | Histone 3                               | Immunovision  | HIS-1004         |
| 16                       | Histones                                | Immunovision  | HIS-1000         |
| 17                       | GBM                                     | Diarect       | A16801           |
| 18                       | C1q                                     | Biodesign     | A90150H          |
| 19                       | BPI                                     | Arotec        | ATB01-02         |
| 24                       | Fibrillarlin                            | Prospec       | ENZ-566          |

|    |                  |           |          |
|----|------------------|-----------|----------|
| 31 | U11/U12          | Origene   | TP303746 |
| 38 | CENP A           | Diarect   | A16901   |
| 39 | EJ               | Diarect   | A11101   |
| 40 | HSP 70           | Stressgen | NSP-555  |
| 41 | HSP 90           | Stressgen | SPP-770  |
| 42 | Intrinsic Factor | Diarect   | A16701   |
| 43 | JO1              | Diarect   | A12901   |
| 44 | Ku, p70/p80      | Diarect   | A17301   |
| 45 | LKM1             | Diarect   | A13501   |
| 46 | MDA5             | Diarect   | A30001   |
| 47 | MI-2             | Diarect   | A18101   |
| 48 | PCNA             | Diarect   | A15401   |
| 49 | PL-12            | Diarect   | A15701   |
| 50 | PL-7             | Diarect   | A15601   |
| 51 | PM/Sci-75        | Diarect   | A17001   |
| 52 | Nucleolin        | Diarect   | A19701   |
| 53 | Ribo P0          | Diarect   | A14101   |
| 54 | Ribo P1          | Diarect   | A14201   |
| 55 | PDC-E2           | Diarect   | A17901   |
| 56 | Ribo P2          | Diarect   | A14301   |
| 57 | SRP54            | Diarect   | A18401   |
| 58 | PM/Sci-100       | Diarect   | A16001   |
| 59 | POLR3H           | Origene   | TP310633 |
| 60 | PDH              | Sigma     | P7032    |
| 62 | Ro60             | Diarect   | A17401   |

|    |               |              |               |
|----|---------------|--------------|---------------|
| 63 | RPP14 (Th/To) | Origene      | TP760291      |
| 65 | Scl-70        | Diarect      | A12401        |
| 67 | Sm/RNP        | Immunovision | SRC-3000      |
| 68 | Smith         | Immunovision | SMA-3000      |
| 70 | Troponin I    | Prospec      | PRO-1269      |
| 73 | TG            | Diarect      | A12201        |
| 74 | GNAL          | Abnova       | H00002774-P01 |
| 75 | MYH6          | Origene      | TP313673      |
| 76 | TPO           | Diarect      | A12101        |
| 77 | ZnT8          |              |               |
| 78 | U1-snRNP 68   | Diarect      | A13001        |
| 79 | U1-snRNP A    | Diarect      | A13101        |
| 83 | RPP25 (Th/To) | Origene      | TP303538      |

**Supplementary Table 3. “COVID-19 Cytokine Array” content.**

| <b>Cytokine/Chemokine Array</b> |                                         |               |                  |
|---------------------------------|-----------------------------------------|---------------|------------------|
| <b>Bead ID</b>                  | <b>Antigen</b>                          | <b>Vendor</b> | <b>Catalog #</b> |
| 1                               | Bare Bead                               |               |                  |
| 2                               | Human IgG from serum                    | Sigma         | I4506            |
| 3                               | Anti-Human IgG Fc fragment Specific     | Jackson       | 109-005-008      |
| 4                               | Anti-Human IgG (H+L)                    | Jackson       | 109-005-003      |
| 5                               | Anti-Human IgG F(ab') fragment specific | Jackson       | 109-005-006      |
| 6                               | CD74                                    | Prospec       | PRO-1467         |
| 7                               | IFN-lambda2                             | Peprotech     | 300-02K          |
| 8                               | IL-1alpha                               | Prospec       | CYT-253          |
| 10                              | ITM2B                                   | Elabscience   | PKSH032599       |
| 26                              | IL-31                                   | Prospec       | CYT-625          |
| 27                              | IL-6                                    | Prospec       | CYT-098          |
| 29                              | OSM                                     | Peprotech     | 300-10           |
| 30                              | IL-11                                   | Prospec       | CYT-214          |
| 32                              | IL-27                                   | Prospec       | CYT-048          |
| 33                              | CNTF                                    | Prospec       | CYT-272          |
| 34                              | CT-2                                    | Prospec       | PRO-1578         |
| 35                              | LIF                                     | Peprotech     | 300-05           |
| 36                              | VEGFB                                   | Peprotech     | 100-20B          |
| 37                              | HTRA1                                   | R&D           | 2916-SE-020      |
| 38                              | GM-CSF                                  | Peprotech     | 300-03           |

|    |             |                    |                |
|----|-------------|--------------------|----------------|
| 39 | IFN-alpha2  | R&D                | 11101-2        |
| 40 | IFN-beta    | Peprotech          | 300-02BC       |
| 41 | IFN-gamma   | Peprotech          | 300-02         |
| 42 | IFN-epsilon | R&D                | 9667-ME-025/CF |
| 43 | IFN-lambda1 | Peprotech          | 300-02L        |
| 44 | IFN-lambda3 | R&D                | 5259-IL-025/CF |
| 45 | IFN-omega   | R&D                | 11395-1        |
| 46 | IL-10       | Peprotech          | 200-10         |
| 47 | IL-12p40    | Peprotech          | 200-12P40      |
| 48 | IL-12p70    | Peprotech          | 200-12         |
| 49 | IL-15       | Peprotech          | 200-15         |
| 50 | IL-17F      | Peprotech          | 200-25         |
| 51 | IL-1beta    | Peprotech          | 200-01B        |
| 52 | IL-22       | Peprotech          | 200-22         |
| 55 | TNF-alpha   | Peprotech          | 300-01A        |
| 56 | TNF-beta    | Peprotech          | 300-01B        |
| 58 | ACE2        | Sino<br>Biological | 10108-H05H     |
| 59 | Eotaxin     | Peprotech          | 300-21         |
| 60 | Eotaxin 2   | Peprotech          | 300-33         |
| 62 | IL-17A      | Peprotech          | 200-17         |
| 63 | IL-33       | Peprotech          | 200-33         |
| 64 | IL-7        | Peprotech          | 200-07         |
| 65 | MIP-1alpha  | Peprotech          | 300-08         |
| 67 | PDGFBB      | Peprotech          | 100-14B        |

|    |              |           |         |
|----|--------------|-----------|---------|
| 68 | sRANK-ligand | Peprotech | 310-01C |
| 69 | TIFI-gamma   | Diarect   | A11001  |



**Supplementary Table 4. “COVID-19 Viral Array” content.**

| <b>Viral Array</b> |                                         |                      |                  |
|--------------------|-----------------------------------------|----------------------|------------------|
| <b>Bead ID</b>     | <b>Antigen</b>                          | <b>Vendor/Source</b> | <b>Catalog #</b> |
| 1                  | Bare Bead                               |                      |                  |
| 2                  | Human IgG from serum                    | Sigma                | I4506            |
| 3                  | Anti-Human IgG Fc fragment Specific     | Jackson              | 109-005-008      |
| 4                  | Anti-Human IgG (H+L)                    | Jackson              | 109-005-003      |
| 5                  | Anti-Human IgG F(ab') fragment specific | Jackson              | 109-005-006      |
| 9                  | SARS2-FL-GCN4                           | Peter Kim Lab        |                  |
| 16                 | SARS1 RBD                               | Peter Kim Lab        |                  |
| 20                 | MERS RBD                                | Peter Kim Lab        |                  |
| 24                 | OC43 RBD                                | Peter Kim Lab        |                  |
| 25                 | 229E-FL-GCN4                            | Peter Kim Lab        |                  |
| 31                 | NL63 RBD                                | Peter Kim Lab        |                  |
| 35                 | HKU1 RBD                                | Peter Kim Lab        |                  |
| 36                 | A/California/07/2009 (H1N1) HA          | Peter Kim Lab        |                  |
| 37                 | Ebola glycoprotein (Ebola GP)           | Peter Kim Lab        |                  |
| 56                 | SARS2 RBD (TW)                          | Taia Wang Lab        |                  |
| 57                 | Spike S1 (TW)                           | Taia Wang Lab        |                  |
| 58                 | M (TW)                                  | Taia Wang Lab        |                  |
| 59                 | N (TW)                                  | Taia Wang Lab        |                  |
| 70                 | HBSAg                                   | MyBioSource          | MBS142509        |
| 71                 | Mumps                                   | Prospec              | MMP-001          |

|    |                    |                 |            |
|----|--------------------|-----------------|------------|
| 72 | Rubella            | Prospec         | RUB-291    |
| 73 | Rubeola            | MyBioSource     | MBS319759  |
| 74 | NSP8               | ProSci          | 97-097     |
| 75 | Spike S2           | ProSci          | 10-115     |
| 76 | Orf 3a             | ProSci          | 10-005     |
| 77 | Orf 8              | ProSci          | 10-002     |
| 78 | 3C like Proteinase | ProSci          | 10-116     |
| 79 | NSP 1              | ProSci          | 97-095     |
| 80 | NSP 7              | ProSci          | 97-096     |
| 81 | Envelope           | ProSci          | 10-112     |
| 82 | ME                 | Sino Biological | 40598-V07E |
| 83 | NSP9               | Sino Biological | 40619-V40E |
| 92 | Plpro              | Sino Biological | 40593-V07E |

**Supplementary Table 5. Marburg University patient cohort clinical characteristics.**

|                                                                 | <b>Marburg (N = 18)</b> |
|-----------------------------------------------------------------|-------------------------|
| <b>Age [Median (IQR)]</b>                                       | 66.50 (62.25-74.50)     |
| <b>Sex [Percent; (N)]</b>                                       |                         |
| female                                                          | 17% (3)                 |
| male                                                            | 83% (15)                |
| <b>BMI [Median (IQR)]</b>                                       | 28.00 (26.17-33.35)     |
| <b>Comorbidities [Percent; (N)]</b>                             |                         |
| diabetes                                                        | 33% (6)                 |
| obesity                                                         | 44% (8)                 |
| chronic cardiac disease                                         | 39% (7)                 |
| coronary heart disease                                          | 17% (3)                 |
| arterial occlusive disease                                      | 0% (0)                  |
| chronic obstructive pulmonary disease                           | 0% (0)                  |
| asthma                                                          | 6% (1)                  |
| renal insufficiency                                             | 11% (2)                 |
| rheumatic disorders                                             | 6% (1)                  |
| neurological neuromuscular disorders                            | 39% (7)                 |
| oncological diseases                                            | 22% (4)                 |
| other immunosuppression                                         | 22% (4)                 |
| <b>Days since start of symptoms</b>                             | ND                      |
| <b>Days since COVID-19 diagnosis<sup>†</sup> [Median (IQR)]</b> | 9.50 (6.00-15.50)       |
| <b>Duration of hospital stay [Median; IQR]</b>                  | 29.00; 21.50-39.75      |
| <b>NIH Severity score</b>                                       |                         |
| moderate/severe                                                 | 33% (6)                 |
| critical                                                        | 61% (11)                |
| <b>Mortality</b>                                                | 28% (5)                 |
| <b>Intensive Care Unit</b>                                      | 78% (14)                |
| <b>Mechanical ventilation</b>                                   | 83% (15)                |
| <b>Supplemental oxygen</b>                                      | 33% (6)                 |
| <b>Therapy [Percent; (N)]</b>                                   |                         |
| antibiotics                                                     | 89% (16)                |
| antivirals                                                      | 28% (5)                 |
| antimycotics                                                    | 11% (2)                 |
| dialysis                                                        | 33% (6)                 |
| Extracorporeal membrane oxygenation                             | 6% (1)                  |
| <b>Inflammatory Biomarkers<sup>‡</sup> [Median (IQR)]</b>       |                         |
| CRP [mg/L]                                                      | 95.20 (47.95-145.68)    |
| IL-6 [pg/ml]                                                    | 95.50 (37.50-126.00)    |
| <i>complement consumption</i>                                   |                         |
| C3 [g/L]                                                        | 1.40 (1.19-1.47)        |
| C4 [g/L]                                                        | 0.36 (0.31-0.57)        |
| CH50 [U/ml]                                                     | 48.00 (43.50-57.75)     |
| AH50 [%]                                                        | 108.00 (102.20-109.00)  |

<sup>†</sup>days since COVID19 diagnosis until first time point

<sup>‡</sup>first measurement during hospital stay

**Supplementary Table 6. University of Pennsylvania patient cohort clinical characteristics.**

|                                                | <b>UPenn (N = 71)</b> |
|------------------------------------------------|-----------------------|
| <b>Age [Median (IQR)]</b>                      | 57.5 (33-82)          |
| <b>Sex [Percent; (N)]</b>                      |                       |
| female                                         | 48% (34)              |
| male                                           | 52% (37)              |
| <b>NIH Disease Severity score</b>              |                       |
| day 0 (mean, range)                            | 3 (2-5)               |
| day 14 (mean, range)                           | 4 (1-7)               |
| Lowest achieved during enrollment              | 3 (1-5)               |
| <b>Mechanical ventilation [Percent; (N)]</b>   | 48% (34)              |
| <b>Thrombotic complications [Percent; (N)]</b> | 32% (22)              |

**Supplementary Table 7. Stanford patient cohort clinical characteristics.**

|                                                                 | <b>Stanford (N = 10)</b> |
|-----------------------------------------------------------------|--------------------------|
| <b>Age [Median (IQR)]</b>                                       | 44 (28-67)               |
| <b>Sex [Percent; (N)]</b>                                       |                          |
| female                                                          | 60% (6)                  |
| male                                                            | 40% (4)                  |
| <b>Days since COVID-19 diagnosis<sup>†</sup> [Median (IQR)]</b> | 36 (8-56)                |
| <b>NIH Severity score</b>                                       |                          |
| moderate/severe                                                 | 80% (8)                  |
| critical                                                        | 20% (2)                  |

<sup>†</sup>days since COVID19 diagnosis until first time point
